# Supplementary material for: Lower Temperatures Exacerbate NLRP3 Inflammasome Activation by Promoting Monosodium Urate Crystallization, Causing Gout
Source: MDPI journal article supplement (doi:10.3390/cells10081919), 2021-07-29

Supplementary Information

**Lower temperature exacerbates NLRP3 inflammasome activation by promoting monosodium urate crystallization, causing gout**

Huijeong Ahn<sup>†</sup>, Gilyoung Lee<sup>†</sup>, and Geun -Shik Lee\*

College of Veterinary Medicine and Institute of Veterinary Science, Kangwon National University, Chuncheon, Gangwon, 24341, Republic of Korea.

Running title: Temperature change regulates gout attack via NLRP3 inflammasome activation

<sup>†</sup>, These authors contributed equally to this work.

\*Correspondence: Geun-Shik Lee, D. V. M., Ph. D.

Laboratory of Inflammatory Diseases, Department of Physiology, College of Veterinary Medicine, Kangwon National University, Chuncheon, Gangwon, 24341, Republic of Korea.

e-mail: leegeun@kangwon.ac.kr, Tel: +82-33-250-8683, Fax: +82-33-244-2367

**Supplemental Table S1. The details of materials**

| Items                                                   | Cat. No.         | Source                                                           |
|---------------------------------------------------------|------------------|------------------------------------------------------------------|
| 12-well-plate                                           | 30012            | SPL Life Science, Gyeonggi-do, Republic of Korea                 |
| 96-well-black plate                                     | 30296            | SPL Life Science, Gyeonggi-do, Republic of Korea                 |
| aluminum potassium sulfate (Alum)                       | 039-4404         | Daejung Chemicals & Materials Co. Gyeonggi-do, Republic of Korea |
| anti-actin antibody                                     | sc-1615          | Santa Cruz Biotechnology, Dallas, TX, USA                        |
| anti-Asc antibody                                       | sc-22514         | Santa Cruz Biotechnology, Dallas, TX, USA                        |
| anti-Casp1 (p20) antibody                               | AG-20B-0042-C100 | AdipoGen Co., San Diego, CA, USA                                 |
| anti-mouse IL-1 $\beta$ antibody                        | AF-401-NA        | R&D Systems, Minneapolis, MN, USA                                |
| anti-NLRP3 antibody                                     | AG-20B-0014-C100 | AdipoGen Co., San Diego, CA, USA                                 |
| CA-074 Me                                               | BML-PI126-0001   | Enzo Life Science, Inc., New York, NY, USA                       |
| chemiluminescence solution (WESTSAVER STAR)             | LF-QC0106        | AbFrontier, Seoul, Republic of Korea                             |
| chemiluminescent system (EZ-Capture II)                 |                  | ATTO Technology, Tokyo, Japan                                    |
| CO <sub>2</sub> analyzer (G100)                         |                  | Geotechnical Instruments, Warwickshire, UK                       |
| CS Analyzer (Ver. 3)                                    |                  | ATTO Technology, Tokyo, Japan                                    |
| cytochalasin D                                          | 1233             | Tocris Bioscience, Bristol, UK                                   |
| diphenyleneiodonium (DPI)                               | 0504             | Tocris Bioscience, Bristol, UK                                   |
| fetal bovine serum (FBS)                                | VWR-97068-085    | Avantor, Gyeongsanbuk-do, Republic of Korea                      |
| flagellin                                               | tlrl-stfla       | Invivogen, San Diego, CA, USA                                    |
| fluorescent beads                                       | L5155 / L4655    | Sigma-Aldrich Co., MO, USA                                       |
| GraphPad Prism 6                                        |                  | GraphPad Software, San Diego, CA, USA                            |
| jetPRIME <sup>TM</sup>                                  | 114-01           | Polyplus-transfection Inc., Illkirch, France                     |
| Lipofectamine 2000                                      | 11668027         | Invitrogen, Carlsbad, CA, USA                                    |
| lipopolysaccharide (LPS)                                | L4130            | Sigma-Aldrich Co., MO, USA                                       |
| mice (C57BL/6)                                          |                  | Nara Biotech, Seoul, Republic of Korea                           |
| microplate spectrophotometer (Synergy <sup>TM</sup> H1) |                  | BioTek, Winooski, VT, USA                                        |
| mini-PROTEAN Tetra cell system                          |                  | Bio-Rad, Hercules, CA, USA                                       |
| Monosodium urate (MSU) crystals                         | U2875            | Sigma-Aldrich Co., MO, USA                                       |
| mouse IL-1 $\beta$ ELISA kit                            | DY401            | R&D Systems, Minneapolis, MN, USA                                |
| nigericin (NG)                                          | 4312             | Tocris Bioscience, Bristol, UK                                   |
| potassium solution (KCl)                                | P2014            | Biosesang, Seoul, Republic of Korea                              |
| proteinase inhibitor cocktail (Halt <sup>TM</sup> )     | 78442            | ThermoFisher Scientific, Middlesex, MA, USA                      |
| PVDF membrane                                           | 88518            | GE Healthcare Bio-Science, Pittsburgh, PA, USA                   |
| RPMI 1640                                               | LM 011-01        | Welgene, Gyeongsanbuk-do, Republic of Korea                      |
| suberic acid bis                                        | S1885            | Sigma-Aldrich Co., MO, USA                                       |
| Z-VAD-FMK                                               | FMK001           | R&D System, Minneapolis, MN, USA                                 |

## Original Images for Blots of Fig. 1B

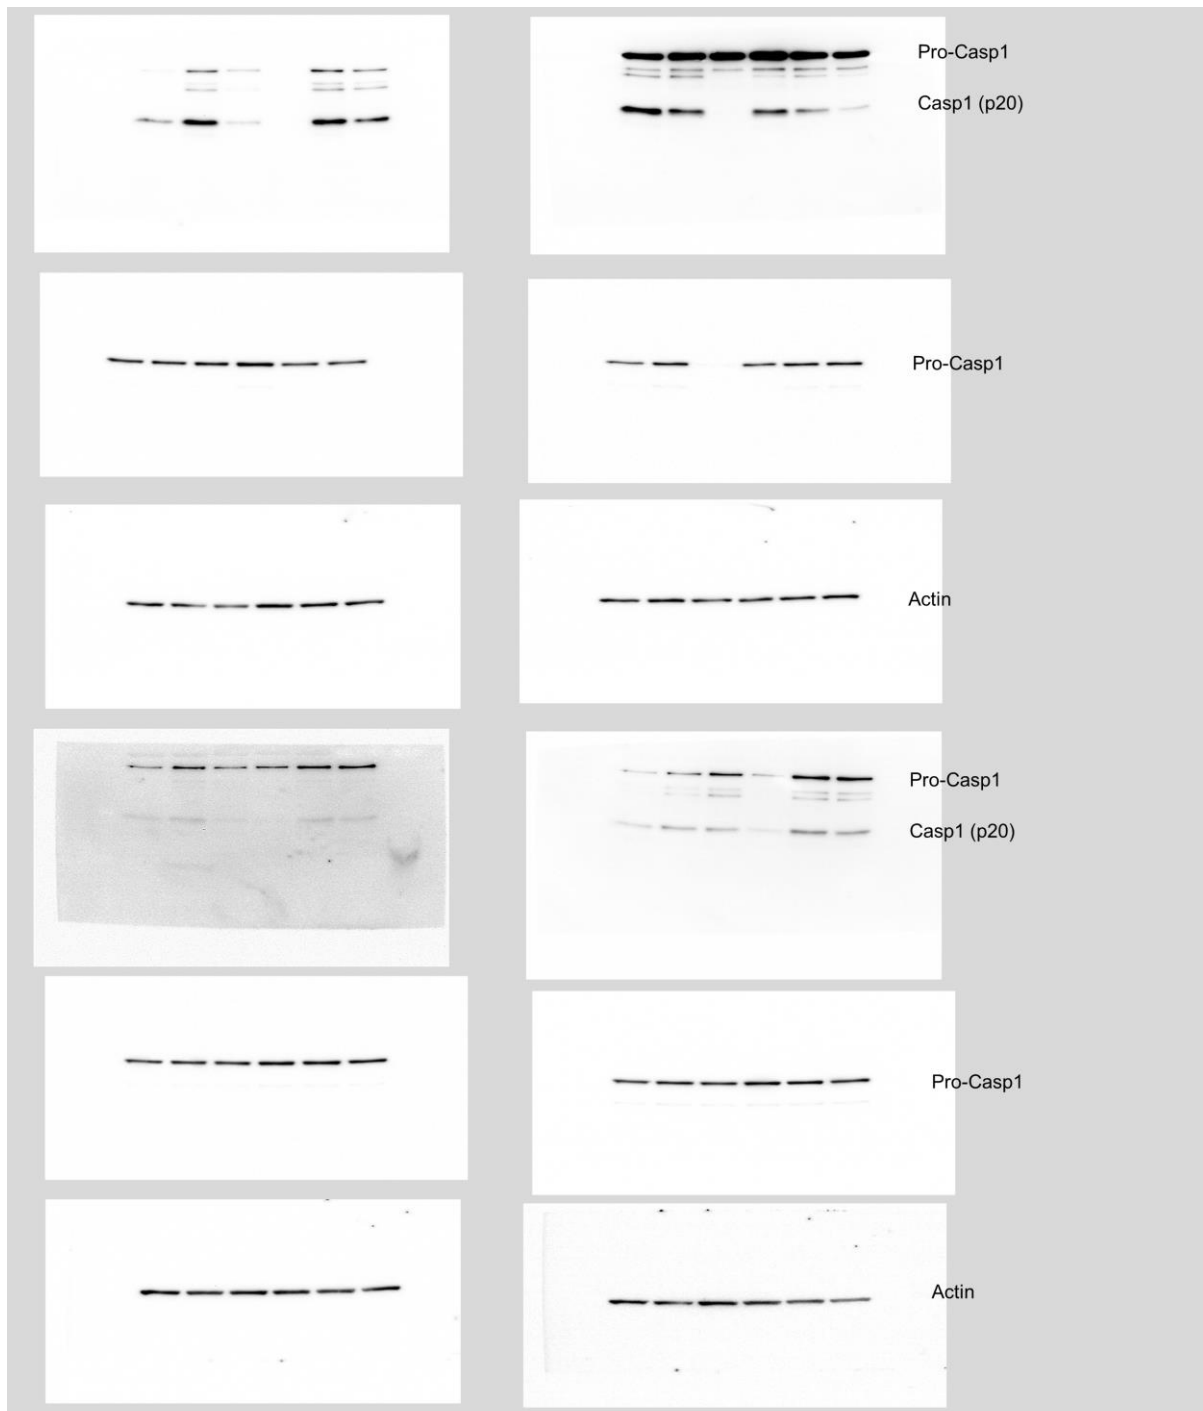

## Original Images for Blots of Fig. 2B

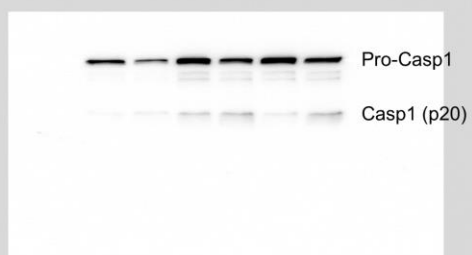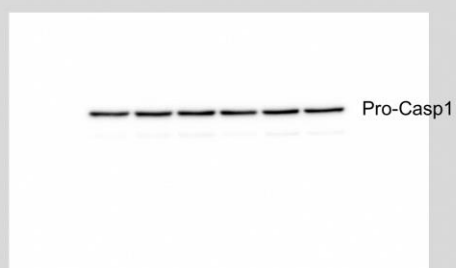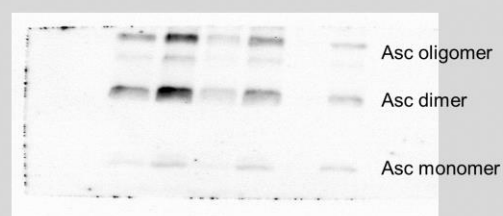

## Original Images for Blots of Fig. 3A

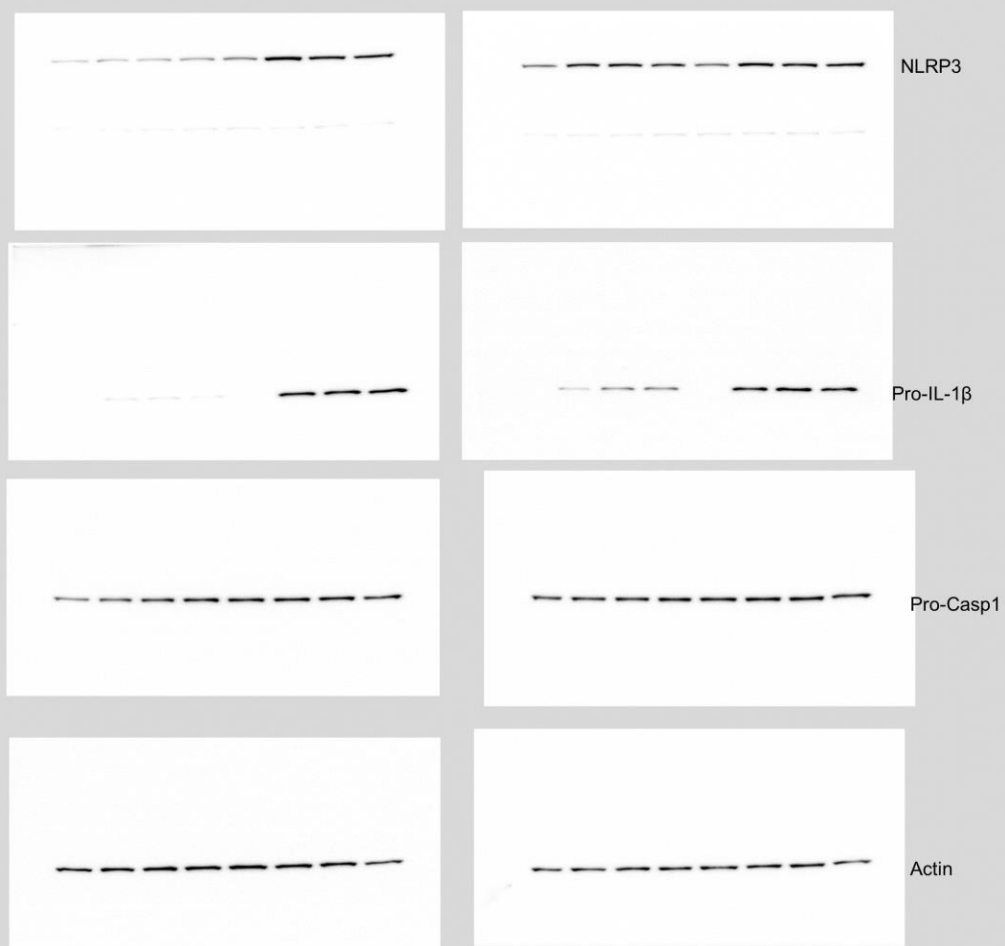

**(Continued.) Original Images for Blots of Fig. 3A**

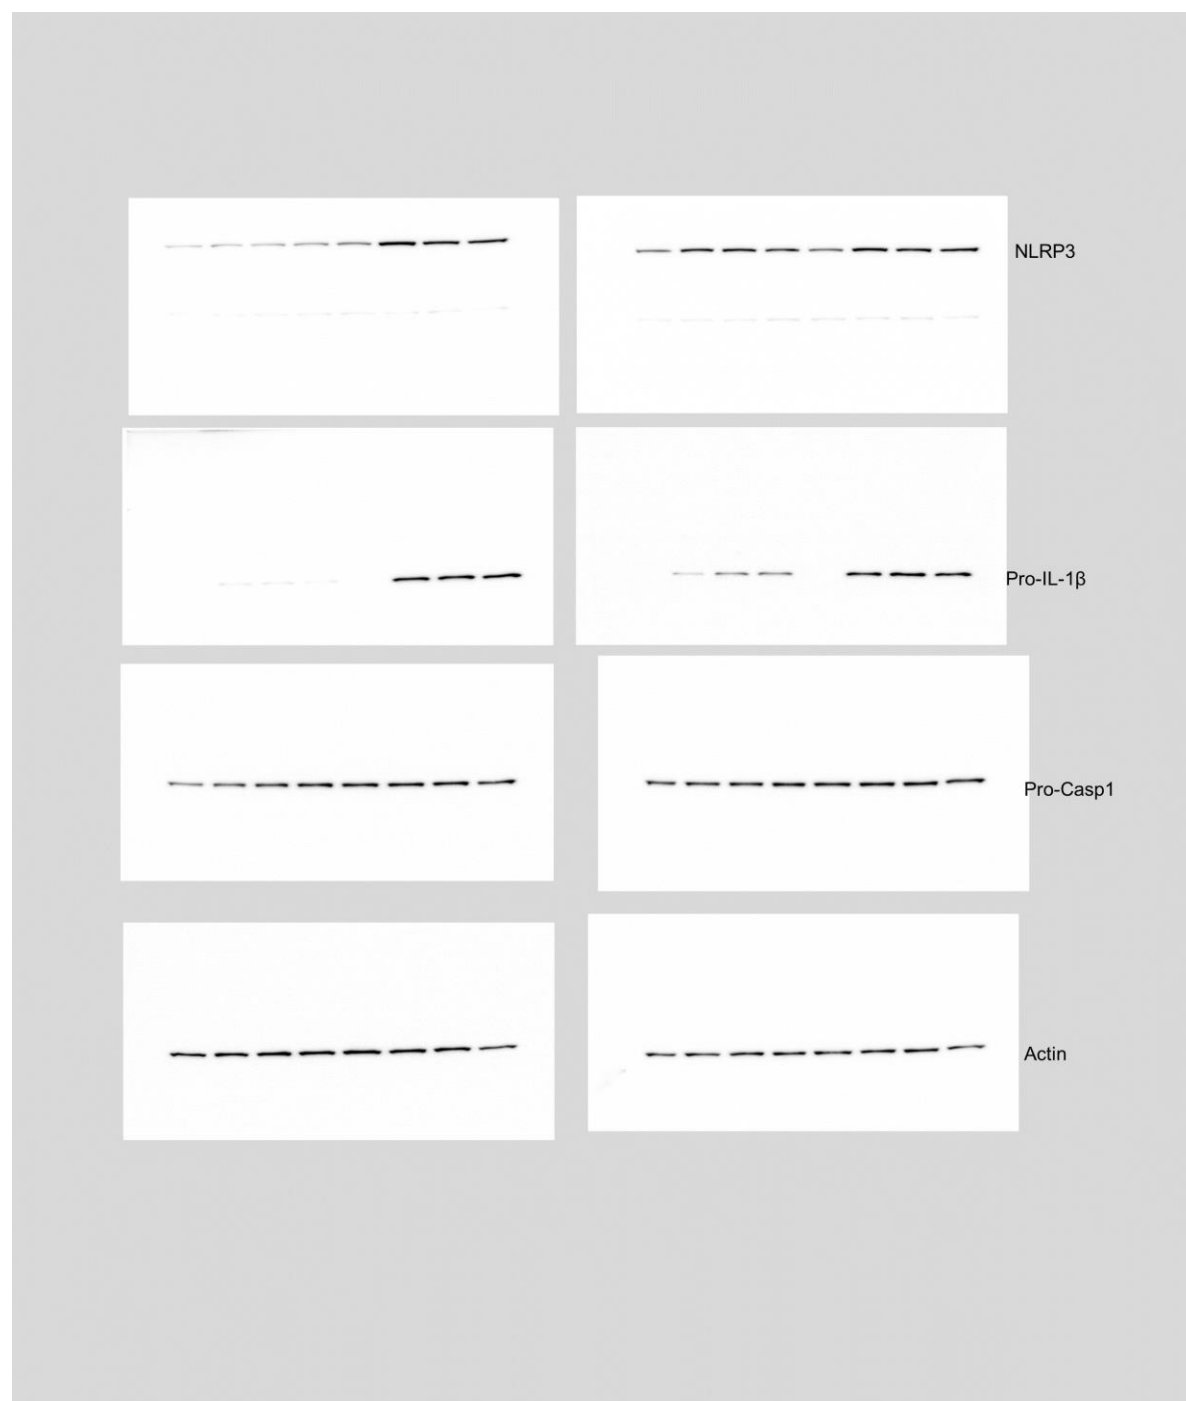

Supplement: s1 [file s1]
